# Supplementary material
Source: MDPI journal article supplement (https://www.mdpi.com/2076-3417/12/11/5556)
Supplement: s1 [file s1]

Table S1. Outcome variables

|                       | Dry needling group |               |                  | Sham group   |               |                  | 1 week difference between groups (95%CI) | Group p value <sup>a</sup> | Time p value <sup>a</sup> | Group: time p value <sup>a</sup> | n2pnp2 (95%CI)       |
|-----------------------|--------------------|---------------|------------------|--------------|---------------|------------------|------------------------------------------|----------------------------|---------------------------|----------------------------------|----------------------|
|                       | Pretreatment       | Posttreatment | 1 week follow-up | Pretreatment | Posttreatment | 1 week follow-up |                                          |                            |                           |                                  |                      |
| Contraction ratio     | 0.26±0.12          | 0.27±0.13     | 0.28±0.11        | 0.22±0.08    | 0.29±0.10     | 0.33±0.08        | 0.049 (-0.041, 0.132)                    | 0.768                      | 0.002                     | 0.043                            | 0.034 (0.002, 0.201) |
| Contraction speed     | 1.46±0.77          | 1.17±0.67     | 1.77±1.15        | 1.15±0.54    | 1.16±0.41     | 1.56±0.95        | -0.209 (-1.08, 0.678)                    | 0.551                      | 0.006                     | 0.261                            | 0.04 (0.001, 0.173)  |
| Contraction thickness | 3.75±0.61          | 3.63±0.53     | 3.71±0.60        | 3.92±0.66    | 3.98±0.70     | 4.03±0.72        | 0.318 (-0.224, 0.83)                     | 0.334                      | 0.409                     | 0.108                            | 0.038 (0.001, 0.146) |
| Muscle area           | 10.00±2.17         | 10.17±2.74    | 10.43±3.08       | 10.78±2.28   | 10.94±2.73    | 11.24±2.86       | 0.811 (-1.633, 3.404)                    | 0.496                      | 0.373                     | 0.998                            | 0.038 (0.001, 0.135) |
| Muscle perimeter      | 11.65±1.25         | 11.73±1.57    | 11.80±1.72       | 11.87±1.94   | 12.15±1.54    | 12.39±1.64       | 0.597 (-0.808, 1.973)                    | 0.556                      | 0.274                     | 0.65                             | 0.037 (0.001, 0.143) |
| PPT                   | 8.40±3.40          | 8.23±3.37     | 9.15±3.63        | 7.43±3.20    | 8.55±3.32     | 8.13±3.47        | -1.018 (-3.866, 1.954)                   | 0.707                      | 0.013                     | 0.038                            | 0.039 (0.002, 0.156) |
| Relaxation speed      | 0.82±0.35          | 0.84±0.38     | 0.82±0.34        | 1.00±0.26    | 1.09±0.34     | 1.19±0.37        | 0.374 (0.058, 0.657)                     | 0.053                      | 0.414                     | 0.37                             | 0.036 (0.001, 0.179) |
| Rest thickness        | 3.00±0.50          | 2.88±0.42     | 2.90±0.37        | 3.22±0.65    | 3.10±0.60     | 3.04±0.60        | 0.144 (-0.263, 0.575)                    | 0.417                      | 0.006                     | 0.634                            | 0.038 (0.001, 0.134) |
| Roland Morris         | 5.20±3.16          |               | 2.70±1.70        | 4.90±2.08    |               | 1.90±1.10        | 0.733                                    |                            |                           | 0.608                            | 0.588 (-0.343, 1.49) |
| VAS                   | 5.90±1.20          | 4.50±1.51     | 3.80±1.75        | 6.30±1.16    | 4.70±1.77     | 4.50±1.35        | 0.7 (-0.7, 1.9)                          | 0.363                      | <0.001                    | 0.851                            | 0.04 (0.001, 0.157)  |

Data expressed with mean±standard deviation.  
 Roland Morris effect size reported with Cohen's D.  
 Significant if p<0.05

# Application of image texture analysis techniques on the effects of dry needling versus placebo in low-back pain patients. A conceptual pilot-study.

**Table S2.** Between groups pairwise comparison p unadjusted and adjusted values

| Group                               | Unadjusted | Bonferroni | Holm  | Benjamini<br>Hochberg | &<br>Benjamini<br>Yekutieli | & |
|-------------------------------------|------------|------------|-------|-----------------------|-----------------------------|---|
| Roland Morris pretreatment          | 0.805      |            |       |                       |                             |   |
| PPT pretreatment                    | 0.521      | 1          | 0.836 | 0.275                 | 0.504                       |   |
| Rest thickness pretreatment         | 0.418      | 1          | 0.836 | 0.275                 | 0.504                       |   |
| Contraction thickness pretreatment  | 0.55       | 1          | 0.836 | 0.275                 | 0.504                       |   |
| Contraction ratio pretreatment      | 0.489      | 1          | 0.836 | 0.275                 | 0.504                       |   |
| Relaxation speed pretreatment       | 0.221      | 0.664      | 0.664 | 0.275                 | 0.504                       |   |
| Muscle perimeter pretreatment       | 0.774      | 1          | 0.836 | 0.302                 | 0.553                       |   |
| Muscle area pretreatment            | 0.442      | 1          | 0.836 | 0.275                 | 0.504                       |   |
| VAS pretreatment                    | 0.426      | 1          | 1     | 0.722                 | 1                           |   |
| Contraction speed pretreatment      | 0.481      | 1          | 1     | 0.722                 | 1                           |   |
| PPT posttreatment                   | 0.832      | 1          | 0.447 | 0.357                 | 0.654                       |   |
| Rest thickness posttreatment        | 0.354      | 1          | 0.447 | 0.331                 | 0.607                       |   |
| Contraction thickness posttreatment | 0.223      | 0.67       | 0.447 | 0.331                 | 0.607                       |   |
| Contraction ratio posttreatment     | 0.686      | 1          | 0.447 | 0.343                 | 0.629                       |   |
| Relaxation speed posttreatment      | 0.128      | 0.383      | 0.383 | 0.331                 | 0.607                       |   |

**Application of image texture analysis techniques on the effects of dry needling versus placebo in low-back pain patients. A conceptual pilot-study.**

| <b>Group</b>                    | <b>Unadjusted</b> | <b>Bonferroni</b> | <b>Holm</b> | <b>Benjamini<br/>Hochberg</b> | <b>&amp;<br/>Benjamini<br/>Yekutieli</b> | <b>&amp;</b> |
|---------------------------------|-------------------|-------------------|-------------|-------------------------------|------------------------------------------|--------------|
| Muscle perimeter posttreatment  | 0.551             | 1                 | 0.447       | 0.331                         | 0.607                                    |              |
| Muscle area posttreatment       | 0.538             | 1                 | 0.447       | 0.331                         | 0.607                                    |              |
| VAS posttreatment               | 0.787             | 1                 | 1           | 1                             | 1                                        |              |
| Contraction speed posttreatment | 0.971             | 1                 | 1           | 1                             | 1                                        |              |
| Roland Morris 1 week            | 0.231             | 0.692             | 0.462       | 0.206                         | 0.378                                    |              |
| PPT 1 week                      | 0.53              | 1                 | 0.462       | 0.206                         | 0.378                                    |              |
| Rest thickness 1 week           | 0.53              | 1                 | 0.462       | 0.206                         | 0.378                                    |              |
| Contraction thickness 1 week    | 0.301             | 0.904             | 0.462       | 0.206                         | 0.378                                    |              |
| Contraction ratio 1 week        | 0.282             | 0.845             | 0.462       | 0.206                         | 0.378                                    |              |
| Relaxation speed 1 week         | 0.03              | 0.089             | 0.089       | 0.089                         | 0.163                                    |              |
| Muscle perimeter 1 week         | 0.437             | 1                 | 0.462       | 0.206                         | 0.378                                    |              |
| Muscle area 1 week              | 0.55              | 1                 | 0.462       | 0.206                         | 0.378                                    |              |
| VAS 1 week                      | 0.178             | 0.534             | 0.534       | 0.534                         | 0.98                                     |              |
| Contraction speed 1 week        | 0.85              | 1                 | 1           | 1                             | 1                                        |              |

**Application of image texture analysis techniques on the effects of dry needling versus placebo in low-back pain patients. A conceptual pilot-study.**

**Table S3.** Within groups pairwise comparison p unadjusted and adjusted values

| <b>Group</b> | <b>Comparison</b>                    | <b>Unadjusted</b> | <b>Bonferroni</b> | <b>Holm</b> | <b>Benjamini &amp; Hochberg</b> |
|--------------|--------------------------------------|-------------------|-------------------|-------------|---------------------------------|
| Sham         | VAS pretreatment - VAS posttreatment | 0.007             | 0.021             | 0.014       | 0.011                           |
| Sham         | VAS pretreatment - VAS 1 week        | 0.003             | 0.008             | 0.008       | 0.008                           |
| Sham         | VAS posttreatment - VAS 1 week       | 0.723             | 1                 | 0.723       | 0.723                           |
| Dry needling | VAS pretreatment - VAS posttreatment | 0.017             | 0.051             | 0.034       | 0.026                           |
| Dry needling | VAS pretreatment - VAS 1 week        | 0.001             | 0.002             | 0.002       | 0.002                           |
| Dry needling | VAS posttreatment - VAS 1 week       | 0.219             | 0.657             | 0.219       | 0.219                           |
| Sham         | PPT pretreatment - PPT posttreatment | 0.016             | 0.048             | 0.048       | 0.048                           |
| Sham         | PPT pretreatment - PPT 1 week        | 0.122             | 0.366             | 0.244       | 0.183                           |
| Sham         | PPT posttreatment - PPT 1 week       | 0.35              | 1                 | 0.35        | 0.35                            |
| Dry needling | PPT pretreatment - PPT posttreatment | 0.702             | 1                 | 0.702       | 0.702                           |
| Dry needling | PPT pretreatment - PPT 1 week        | 0.098             | 0.294             | 0.196       | 0.147                           |

**Application of image texture analysis techniques on the effects of dry needling versus placebo in low-back pain patients. A conceptual pilot-study.**

| <b>Group</b> | <b>Comparison</b>                                                | <b>Unadjusted</b> | <b>Bonferroni</b> | <b>Holm</b> | <b>Benjamini &amp; Hochberg</b> |
|--------------|------------------------------------------------------------------|-------------------|-------------------|-------------|---------------------------------|
| Dry needling | PPT posttreatment - PPT 1 week                                   | 0.044             | 0.133             | 0.133       | 0.133                           |
| Sham         | Contraction speed pretreatment - Contraction speed posttreatment | 0.974             | 1                 | 0.974       | 0.974                           |
| Sham         | Contraction speed pretreatment - Contraction speed 1 week        | 0.093             | 0.279             | 0.279       | 0.148                           |
| Sham         | Contraction speed posttreatment - Contraction speed 1 week       | 0.099             | 0.297             | 0.279       | 0.148                           |
| Dry needling | Contraction speed pretreatment - Contraction speed posttreatment | 0.224             | 0.671             | 0.4         | 0.224                           |
| Dry needling | Contraction speed pretreatment - Contraction speed 1 week        | 0.2               | 0.6               | 0.4         | 0.224                           |
| Dry needling | Contraction speed posttreatment - Contraction speed 1 week       | 0.015             | 0.046             | 0.046       | 0.046                           |
| Sham         | Rest thickness pretreatment - Rest thickness posttreatment       | 0.07              | 0.211             | 0.141       | 0.106                           |
| Sham         | Rest thickness pretreatment - Rest thickness 1 week              | 0.008             | 0.025             | 0.025       | 0.025                           |
| Sham         | Rest thickness posttreatment - Rest thickness 1 week             | 0.36              | 1                 | 0.36        | 0.36                            |

**Application of image texture analysis techniques on the effects of dry needling versus placebo in low-back pain patients. A conceptual pilot-study.**

| <b>Group</b> | <b>Comparison</b>                                                        | <b>Unadjusted</b> | <b>Bonferroni</b> | <b>Holm</b> | <b>Benjamini &amp; Hochberg</b> |
|--------------|--------------------------------------------------------------------------|-------------------|-------------------|-------------|---------------------------------|
| Dry needling | Rest thickness pretreatment - Rest thickness posttreatment               | 0.058             | 0.174             | 0.174       | 0.157                           |
| Dry needling | Rest thickness pretreatment - Rest thickness 1 week                      | 0.104             | 0.313             | 0.209       | 0.157                           |
| Dry needling | Rest thickness posttreatment - Rest thickness 1 week                     | 0.771             | 1                 | 0.771       | 0.771                           |
| Sham         | Contraction thickness pretreatment - Contraction thickness posttreatment | 0.349             | 1                 | 0.697       | 0.486                           |
| Sham         | Contraction thickness pretreatment - Contraction thickness 1 week        | 0.107             | 0.321             | 0.321       | 0.321                           |
| Sham         | Contraction thickness posttreatment - Contraction thickness 1 week       | 0.486             | 1                 | 0.697       | 0.486                           |
| Dry needling | Contraction thickness pretreatment - Contraction thickness posttreatment | 0.061             | 0.184             | 0.184       | 0.184                           |
| Dry needling | Contraction thickness pretreatment - Contraction thickness 1 week        | 0.476             | 1                 | 0.476       | 0.476                           |
| Dry needling | Contraction thickness posttreatment - Contraction thickness 1 week       | 0.234             | 0.701             | 0.467       | 0.35                            |

**Application of image texture analysis techniques on the effects of dry needling versus placebo in low-back pain patients. A conceptual pilot-study.**

| <b>Group</b> | <b>Comparison</b>                                                | <b>Unadjusted</b> | <b>Bonferroni</b> | <b>Holm</b> | <b>Benjamini &amp; Hochberg</b> |
|--------------|------------------------------------------------------------------|-------------------|-------------------|-------------|---------------------------------|
| Sham         | Contraction ratio pretreatment - Contraction ratio posttreatment | 0.007             | 0.02              | 0.013       | 0.01                            |
| Sham         | Contraction ratio pretreatment - Contraction ratio 1 week        | <0.001            | <0.001            | <0.001      | <0.001                          |
| Sham         | Contraction ratio posttreatment - Contraction ratio 1 week       | 0.095             | 0.286             | 0.095       | 0.095                           |
| Dry needling | Contraction ratio pretreatment - Contraction ratio posttreatment | 0.623             | 1                 | 1           | 0.655                           |
| Dry needling | Contraction ratio pretreatment - Contraction ratio 1 week        | 0.35              | 1                 | 1           | 0.655                           |
| Dry needling | Contraction ratio posttreatment - Contraction ratio 1 week       | 0.655             | 1                 | 1           | 0.655                           |
| Sham         | Relaxation speed pretreatment - Relaxation speed posttreatment   | 0.347             | 1                 | 0.647       | 0.347                           |
| Sham         | Relaxation speed pretreatment - Relaxation speed 1 week          | 0.058             | 0.175             | 0.175       | 0.175                           |
| Sham         | Relaxation speed posttreatment - Relaxation speed 1 week         | 0.323             | 0.97              | 0.647       | 0.347                           |

**Application of image texture analysis techniques on the effects of dry needling versus placebo in low-back pain patients. A conceptual pilot-study.**

| <b>Group</b> | <b>Comparison</b>                                              | <b>Unadjusted</b> | <b>Bonferroni</b> | <b>Holm</b> | <b>Benjamini &amp; Hochberg</b> |
|--------------|----------------------------------------------------------------|-------------------|-------------------|-------------|---------------------------------|
| Dry needling | Relaxation speed pretreatment - Relaxation speed posttreatment | 0.912             | 1                 | 1           | 0.954                           |
| Dry needling | Relaxation speed pretreatment - Relaxation speed 1 week        | 0.954             | 1                 | 1           | 0.954                           |
| Dry needling | Relaxation speed posttreatment - Relaxation speed 1 week       | 0.867             | 1                 | 1           | 0.954                           |
| Sham         | Muscle perimeter pretreatment - Muscle perimeter posttreatment | 0.337             | 1                 | 0.674       | 0.405                           |
| Sham         | Muscle perimeter pretreatment - Muscle perimeter 1 week        | 0.078             | 0.233             | 0.233       | 0.233                           |
| Sham         | Muscle perimeter posttreatment - Muscle perimeter 1 week       | 0.405             | 1                 | 0.674       | 0.405                           |
| Dry needling | Muscle perimeter pretreatment - Muscle perimeter posttreatment | 0.798             | 1                 | 1           | 0.811                           |
| Dry needling | Muscle perimeter pretreatment - Muscle perimeter 1 week        | 0.621             | 1                 | 1           | 0.811                           |
| Dry needling | Muscle perimeter posttreatment - Muscle perimeter 1 week       | 0.811             | 1                 | 1           | 0.811                           |



**Application of image texture analysis techniques on the effects of dry needling versus placebo in low-back pain patients. A conceptual pilot-study.**

| <b>Group</b>    | <b>Comparison</b>                                       | <b>Unadjusted</b> | <b>Bonferroni</b> | <b>Holm</b> | <b>Benjamini &amp; Hochberg</b> |
|-----------------|---------------------------------------------------------|-------------------|-------------------|-------------|---------------------------------|
| Sham            | Muscle area pretreatment -<br>Muscle area posttreatment | 0.726             | 1                 | 1           | 0.726                           |
| Sham            | Muscle area pretreatment -<br>Muscle area 1 week        | 0.311             | 0.933             | 0.933       | 0.726                           |
| Sham            | Muscle area posttreatment -<br>Muscle area 1 week       | 0.505             | 1                 | 1           | 0.726                           |
| Dry<br>needling | Muscle area pretreatment -<br>Muscle area posttreatment | 0.705             | 1                 | 1           | 0.705                           |
| Dry<br>needling | Muscle area pretreatment -<br>Muscle area 1 week        | 0.341             | 1                 | 1           | 0.705                           |
| Dry<br>needling | Muscle area posttreatment -<br>Muscle area 1 week       | 0.564             | 1                 | 1           | 0.705                           |
| Sham            | Roland<br>pretreatment -<br>Morris 1 week               | Morris<br>Roland  | 0.001             |             |                                 |
| Dry<br>needling | Roland<br>pretreatment -<br>Morris 1 week               | Morris<br>Roland  | 0.007             |             |                                 |

Application of image texture analysis techniques on the effects of dry needling versus placebo in low-back pain patients. A conceptual pilot-study.

Table S4. Top five loading texture features for each component

|                                | Dry needling                                       |                                   |                                   |                       |                |                                  |                           |                           |                            | Sham                      |                                   |                                  |                           |                                   |                                  |                           |                                          |                                   |
|--------------------------------|----------------------------------------------------|-----------------------------------|-----------------------------------|-----------------------|----------------|----------------------------------|---------------------------|---------------------------|----------------------------|---------------------------|-----------------------------------|----------------------------------|---------------------------|-----------------------------------|----------------------------------|---------------------------|------------------------------------------|-----------------------------------|
|                                | Pretreatment                                       |                                   |                                   | Posttreatment         |                |                                  | 1 week                    |                           |                            | Pretreatment              |                                   |                                  | Posttreatment             |                                   |                                  | 1 week                    |                                          |                                   |
|                                | PC1                                                | PC2                               | PC3                               | PC1                   | PC2            | PC3                              | PC1                       | PC2                       | PC3                        | PC1                       | PC2                               | PC3                              | PC1                       | PC2                               | PC3                              | PC1                       | PC2                                      | PC3                               |
|                                | Sum entropy at 0°                                  | Difference variance at 0° at 45°  | Run length non-uniformity at 135° | Variance              | Kurtosis       | Short run emphasis at 90°        | Sum entropy at 0° at 135° | Sum entropy at 0° at 135° | Dissimilarity at 135°      | Sum entropy at 0° at 90°  | Long run emphasis at 135°         | Difference variance at 0° at 45° | Sum entropy at 0° at 45°  | Short run emphasis at 135°        | Difference variance at 0° at 45° | Sum entropy at 0° at 135° | Maximum probability at 135°              | Grey level non-uniformity at 90°  |
|                                | Standard deviation                                 | Difference variance at 0° at 90°  | Run percentage at 135°            | Standard deviation    | Energy at 45°  | Dissimilarity at 90°             | Sum entropy at 0° at 90°  | Sum entropy at 0° at 90°  | Dissimilarity at 90°       | Sum entropy at 0° at 45°  | Run percentage at 135°            | Contrast at 0° at 45°            | Sum entropy at 0° at 90°  | Run percentage at 135°            | Contrast at 0° at 45°            | Sum entropy at 0° at 90°  | Maximum probability at 0°                | Grey level non-uniformity at 135° |
|                                | Entropy at 0°                                      | Contrast at 0° at 45°             | Short run emphasis at 135°        | Entropy at 0° at 90°  | Energy at 0°   | Dissimilarity at 135°            | Sum entropy at 0°         | Sum entropy at 0°         | Dissimilarity at 45°       | Sum entropy at 0° at 135° | Long run emphasis at 90°          | Difference variance at 0° at 90° | Entropy at 0° at 135°     | Run length non-uniformity at 135° | Difference entropy at 0° at 45°  | Sum entropy at 0° at 45°  | Maximum probability at 90°               | Grey level non-uniformity at 45°  |
|                                | Variance                                           | Contrast at 0° at 90°             | Long run emphasis at 135°         | Entropy at 0° at 135° | Energy at 90°  | Run length non-uniformity at 90° | Entropy at 0°             | Entropy at 0°             | Short run emphasis at 135° | Entropy at 0° at 135°     | Short run emphasis at 135°        | Grey level non-uniformity at 45° | Sum entropy at 0° at 135° | Run percentage at 90°             | Inverse difference at 0° at 45°  | Sum entropy at 0°         | Long run low grey level emphasis at 135° | Kurtosis                          |
|                                | Information Measures of Correlation B at 0° at 45° | Difference variance at 0° at 135° | Run length non-uniformity at 90°  | Entropy at 0° at 45°  | Energy at 135° | Short run emphasis at 135°       | Sum entropy at 0° at 45°  | Sum entropy at 0° at 45°  | Short run emphasis at 90°  | Sum entropy at 0°         | Run length non-uniformity at 135° | Blob standard deviation          | Entropy at 0° at 90°      | Long run emphasis at 90°          | Difference entropy at 0°         | Entropy at 0° at 135°     | Long run low grey level emphasis at 90°  | Skewness                          |
| Overall variance explained (%) | 7.22                                               | 7.55                              | 11.19                             | 6.91                  | 8.28           | 9.08                             | 5.88                      | 0.74                      | 10.25                      | 6.48                      | 8.91                              | 9.66                             | 6.61                      | 8.71                              | 9.63                             | 6.73                      | 7.98                                     | 12.14                             |

# Application of image texture analysis techniques on the effects of dry needling versus placebo in low-back pain patients. A conceptual pilot-study.

**Table S5.** Test de permutaciones exacto

Between groups differences.

|                                             | Pretreatment   |                   | Posttreatment  |             | 1 week         |                   |
|---------------------------------------------|----------------|-------------------|----------------|-------------|----------------|-------------------|
|                                             | U Mann-Whitney | Exact permutation | U Mann-Whitney | Permutation | U Mann-Whitney | Exact permutation |
| Homogeneity at 0°                           | 0.123          | 0.15              | 0.19           | 0.248       | 0.19           | 0.285             |
| Contrast at 0°                              | 0.579          | 0.417             | 0.529          | 0.585       | 1              | 0.999             |
| Inverse difference at 0°                    | 0.579          | 0.417             | 0.529          | 0.585       | 1              | 0.999             |
| Entropy at 0°                               | 0.123          | 0.095             | 0.143          | 0.179       | 0.19           | 0.184             |
| Correlation at 0°                           | 0.029          | 0.03              | 0.19           | 0.087       | 0.089          | 0.04              |
| Sum average at 0°                           | 0.105          | 0.209             | 0.218          | 0.128       | 0.481          | 0.356             |
| Sum entropy at 0°                           | 0.123          | 0.09              | 0.105          | 0.171       | 0.218          | 0.169             |
| Difference entropy at 0°                    | 0.579          | 0.43              | 0.529          | 0.678       | 1              | 0.956             |
| Difference variance at 0°                   | 0.579          | 0.424             | 0.529          | 0.636       | 1              | 0.976             |
| Sum variance at 0°                          | 0.105          | 0.271             | 0.218          | 0.121       | 0.481          | 0.443             |
| Information Measures of Correlation A at 0° | 0.052          | 0.044             | 0.063          | 0.064       | 0.035          | 0.02              |
| Information Measures of Correlation B at 0° | 0.123          | 0.061             | 0.075          | 0.123       | 0.089          | 0.078             |
| Cluster Shade at 0°                         | 0.105          | 0.03              | 0.912          | 0.294       | 0.28           | 0.643             |

# Application of image texture analysis techniques on the effects of dry needling versus placebo in low-back pain patients. A conceptual pilot-study.

Between groups differences.

|                                                    | Pretreatment   |                   | Posttreatment  |             | 1 week         |                   |
|----------------------------------------------------|----------------|-------------------|----------------|-------------|----------------|-------------------|
|                                                    | U Mann-Whitney | Exact permutation | U Mann-Whitney | Permutation | U Mann-Whitney | Exact permutation |
| Cluster prominence at 0°                           | 0.052          | 0.021             | 0.19           | 0.089       | 0.218          | 0.393             |
| Homogeneity at 0° at 45°                           | 0.123          | 0.186             | 0.247          | 0.321       | 0.247          | 0.374             |
| Contrast at 0° at 45°                              | 0.579          | 0.484             | 0.853          | 0.697       | 0.796          | 0.867             |
| Inverse difference at 0° at 45°                    | 0.579          | 0.482             | 0.912          | 0.722       | 0.912          | 0.869             |
| Entropy at 0° at 45°                               | 0.143          | 0.108             | 0.143          | 0.21        | 0.218          | 0.248             |
| Correlation at 0° at 45°                           | 0.063          | 0.049             | 0.165          | 0.054       | 0.063          | 0.016             |
| Sum average at 0° at 45°                           | 0.105          | 0.21              | 0.218          | 0.129       | 0.481          | 0.359             |
| Sum entropy at 0° at 45°                           | 0.143          | 0.098             | 0.105          | 0.181       | 0.218          | 0.175             |
| Difference entropy at 0° at 45°                    | 0.529          | 0.534             | 0.912          | 0.889       | 0.796          | 0.871             |
| Difference variance at 0° at 45°                   | 0.529          | 0.507             | 1              | 0.757       | 0.912          | 0.862             |
| Sum variance at 0° at 45°                          | 0.105          | 0.273             | 0.218          | 0.122       | 0.481          | 0.445             |
| Information Measures of Correlation A at 0° at 45° | 0.043          | 0.034             | 0.089          | 0.069       | 0.019          | 0.014             |
| Information Measures of Correlation B at 0° at 45° | 0.123          | 0.058             | 0.063          | 0.124       | 0.105          | 0.076             |

# Application of image texture analysis techniques on the effects of dry needling versus placebo in low-back pain patients. A conceptual pilot-study.

Between groups differences.

|                                                    | Pretreatment   |                   | Posttreatment  |             | 1 week         |                   |
|----------------------------------------------------|----------------|-------------------|----------------|-------------|----------------|-------------------|
|                                                    | U Mann-Whitney | Exact permutation | U Mann-Whitney | Permutation | U Mann-Whitney | Exact permutation |
| Cluster Shade at 0° at 45°                         | 0.075          | 0.028             | 0.853          | 0.268       | 0.28           | 0.574             |
| Cluster prominence at 0° at 45°                    | 0.043          | 0.021             | 0.19           | 0.076       | 0.218          | 0.354             |
| Homogeneity at 0° at 90°                           | 0.123          | 0.177             | 0.247          | 0.304       | 0.247          | 0.352             |
| Contrast at 0° at 90°                              | 0.631          | 0.469             | 0.912          | 0.607       | 0.853          | 0.904             |
| Inverse difference at 0° at 90°                    | 0.684          | 0.472             | 0.853          | 0.649       | 0.853          | 0.894             |
| Entropy at 0° at 90°                               | 0.123          | 0.105             | 0.143          | 0.202       | 0.218          | 0.238             |
| Correlation at 0° at 90°                           | 0.052          | 0.054             | 0.143          | 0.054       | 0.075          | 0.019             |
| Sum average at 0° at 90°                           | 0.105          | 0.21              | 0.218          | 0.128       | 0.481          | 0.355             |
| Sum entropy at 0° at 90°                           | 0.105          | 0.096             | 0.089          | 0.18        | 0.218          | 0.174             |
| Difference entropy at 0° at 90°                    | 0.631          | 0.526             | 0.912          | 0.809       | 0.853          | 0.917             |
| Difference variance at 0° at 90°                   | 0.579          | 0.487             | 1              | 0.653       | 0.853          | 0.91              |
| Sum variance at 0° at 90°                          | 0.105          | 0.274             | 0.218          | 0.121       | 0.481          | 0.442             |
| Information Measures of Correlation A at 0° at 90° | 0.043          | 0.036             | 0.052          | 0.054       | 0.011          | 0.016             |

# Application of image texture analysis techniques on the effects of dry needling versus placebo in low-back pain patients. A conceptual pilot-study.

Between groups differences.

|                                                    | Pretreatment   |                   | Posttreatment  |             | 1 week         |                   |
|----------------------------------------------------|----------------|-------------------|----------------|-------------|----------------|-------------------|
|                                                    | U Mann-Whitney | Exact permutation | U Mann-Whitney | Permutation | U Mann-Whitney | Exact permutation |
| Information Measures of Correlation B at 0° at 90° | 0.123          | 0.055             | 0.075          | 0.114       | 0.105          | 0.073             |
| Cluster Shade at 0° at 90°                         | 0.063          | 0.027             | 0.912          | 0.263       | 0.28           | 0.617             |
| Cluster prominence at 0° at 90°                    | 0.043          | 0.019             | 0.19           | 0.076       | 0.247          | 0.369             |
| Homogeneity at 0° at 135°                          | 0.143          | 0.179             | 0.218          | 0.299       | 0.247          | 0.354             |
| Contrast at 0° at 135°                             | 0.684          | 0.456             | 0.853          | 0.518       | 0.78           | 0.904             |
| Inverse difference at 0° at 135°                   | 0.631          | 0.469             | 0.739          | 0.583       | 0.796          | 0.898             |
| Entropy at 0° at 135°                              | 0.123          | 0.108             | 0.123          | 0.192       | 0.247          | 0.234             |
| Correlation at 0° at 135°                          | 0.052          | 0.05              | 0.143          | 0.065       | 0.052          | 0.02              |
| Sum average at 0° at 135°                          | 0.105          | 0.211             | 0.218          | 0.128       | 0.481          | 0.356             |
| Sum entropy at 0° at 135°                          | 0.105          | 0.097             | 0.105          | 0.175       | 0.19           | 0.17              |
| Difference entropy at 0° at 135°                   | 0.631          | 0.52              | 0.912          | 0.729       | 0.853          | 0.908             |
| Difference variance at 0° at 135°                  | 0.684          | 0.47              | 0.971          | 0.553       | 0.971          | 0.903             |

# Application of image texture analysis techniques on the effects of dry needling versus placebo in low-back pain patients. A conceptual pilot-study.

Between groups differences.

|                                                     | Pretreatment   |                   | Posttreatment  |             | 1 week         |                   |
|-----------------------------------------------------|----------------|-------------------|----------------|-------------|----------------|-------------------|
|                                                     | U Mann-Whitney | Exact permutation | U Mann-Whitney | Permutation | U Mann-Whitney | Exact permutation |
| Sum variance at 0° at 135°                          | 0.105          | 0.275             | 0.218          | 0.121       | 0.481          | 0.442             |
| Information Measures of Correlation A at 0° at 135° | 0.035          | 0.032             | 0.052          | 0.054       | 0.011          | 0.014             |
| Information Measures of Correlation B at 0° at 135° | 0.105          | 0.053             | 0.063          | 0.112       | 0.105          | 0.07              |
| Cluster Shade at 0° at 135°                         | 0.063          | 0.027             | 0.912          | 0.265       | 0.28           | 0.604             |
| Cluster prominence at 0° at 135°                    | 0.043          | 0.019             | 0.19           | 0.077       | 0.247          | 0.352             |
| LBP entropy                                         | 0.659          | 0.702             | 1              | 1           | 0.905          | 1                 |
| Blob mean                                           | 0.353          | 0.251             | 0.382          | 0.268       | 0.684          | 0.605             |
| Blob standard deviation                             | 0.393          | 0.216             | 0.481          | 0.354       | 0.349          | 0.243             |
| Blob count                                          | 0.305          | 0.314             | 0.138          | 0.168       | 0.362          | 0.289             |
| Autocorrelation at 0°                               | 0.393          | 0.273             | 0.035          | 0.042       | 0.954          | 0.413             |
| Dissimilarity at 0°                                 | 0.247          | 0.162             | 0.853          | 0.73        | 0.184          | 0.132             |
| Energy at 0°                                        | 0.684          | 0.87              | 0.393          | 0.521       | 0.896          | 0.973             |

# Application of image texture analysis techniques on the effects of dry needling versus placebo in low-back pain patients. A conceptual pilot-study.

Between groups differences.

|                             | Pretreatment   |                   | Posttreatment  |             | 1 week         |                   |
|-----------------------------|----------------|-------------------|----------------|-------------|----------------|-------------------|
|                             | U Mann-Whitney | Exact permutation | U Mann-Whitney | Permutation | U Mann-Whitney | Exact permutation |
| Maximum probability at 0°   | 0.853          | 0.959             | 0.353          | 0.513       | 0.954          | 0.736             |
| Autocorrelation at 45°      | 0.353          | 0.273             | 0.063          | 0.042       | 1              | 0.403             |
| Dissimilarity at 45°        | 0.105          | 0.072             | 0.436          | 0.482       | 0.028          | 0.047             |
| Energy at 45°               | 0.631          | 0.854             | 0.436          | 0.466       | 0.838          | 0.808             |
| Maximum probability at 45°  | 0.631          | 0.973             | 0.353          | 0.393       | 0.343          | 0.458             |
| Autocorrelation at 90°      | 0.393          | 0.276             | 0.063          | 0.043       | 0.954          | 0.407             |
| Dissimilarity at 90°        | 0.089          | 0.08              | 0.529          | 0.572       | 0.022          | 0.048             |
| Energy at 90°               | 0.529          | 0.814             | 0.353          | 0.404       | 0.838          | 0.828             |
| Maximum probability at 90°  | 0.684          | 0.97              | 0.28           | 0.313       | 0.271          | 0.469             |
| Autocorrelation at 135°     | 0.393          | 0.274             | 0.063          | 0.043       | 0.954          | 0.404             |
| Dissimilarity at 135°       | 0.089          | 0.077             | 0.579          | 0.704       | 0.041          | 0.061             |
| Energy at 135°              | 0.579          | 0.835             | 0.315          | 0.39        | 0.896          | 0.856             |
| Maximum probability at 135° | 0.796          | 0.969             | 0.247          | 0.353       | 0.382          | 0.452             |



# Application of image texture analysis techniques on the effects of dry needling versus placebo in low-back pain patients. A conceptual pilot-study.

Between groups differences.

|                                         | Pretreatment   |                   | Posttreatment  |             | 1 week         |                   |
|-----------------------------------------|----------------|-------------------|----------------|-------------|----------------|-------------------|
|                                         | U Mann-Whitney | Exact permutation | U Mann-Whitney | Permutation | U Mann-Whitney | Exact permutation |
| Grey level non-uniformity at 0°         | 0.143          | 0.084             | 0.123          | 0.086       | 0.011          | 0.017             |
| High grey level run emphasis at 0°      | 0.247          | 0.195             | 0.029          | 0.046       | 0.837          | 0.373             |
| Long run emphasis at 0°                 | 0.353          | 0.167             | 0.912          | 0.593       | 0.21           | 0.253             |
| Long run low grey level emphasis at 0°  | 0.796          | 0.81              | 0.007          | 0.007       | 0.616          | 0.471             |
| Run length non-uniformity at 0°         | 0.247          | 0.163             | 0.912          | 0.792       | 0.21           | 0.156             |
| Run percentage at 0°                    | 0.28           | 0.162             | 0.912          | 0.698       | 0.21           | 0.182             |
| Short run emphasis at 0°                | 0.19           | 0.131             | 0.853          | 0.699       | 0.21           | 0.205             |
| Grey level non-uniformity at 45°        | 0.315          | 0.237             | 0.28           | 0.188       | 0.051          | 0.057             |
| High grey level run emphasis at 45°     | 0.247          | 0.214             | 0.043          | 0.05        | 0.895          | 0.39              |
| Long run emphasis at 45°                | 0.165          | 0.187             | 0.853          | 0.748       | 0.06           | 0.111             |
| Long run low grey level emphasis at 45° | 0.684          | 0.688             | 0.015          | 0.009       | 0.67           | 0.473             |
| Run length non-uniformity at 45°        | 0.28           | 0.19              | 0.481          | 0.635       | 0.034          | 0.08              |

# Application of image texture analysis techniques on the effects of dry needling versus placebo in low-back pain patients. A conceptual pilot-study.

Between groups differences.

|                                         | Pretreatment   |                   | Posttreatment  |             | 1 week         |                   |
|-----------------------------------------|----------------|-------------------|----------------|-------------|----------------|-------------------|
|                                         | U Mann-Whitney | Exact permutation | U Mann-Whitney | Permutation | U Mann-Whitney | Exact permutation |
| Run percentage at 45°                   | 0.247          | 0.184             | 0.739          | 0.692       | 0.06           | 0.088             |
| Short run emphasis at 45°               | 0.28           | 0.219             | 0.481          | 0.531       | 0.034          | 0.101             |
| Grey level non-uniformity at 90°        | 0.28           | 0.239             | 0.393          | 0.224       | 0.042          | 0.049             |
| High grey level run emphasis at 90°     | 0.247          | 0.212             | 0.043          | 0.053       | 0.895          | 0.393             |
| Long run emphasis at 90°                | 0.165          | 0.163             | 0.971          | 0.881       | 0.05           | 0.127             |
| Long run low grey level emphasis at 90° | 0.739          | 0.669             | 0.011          | 0.009       | 0.67           | 0.479             |
| Run length non-uniformity at 90°        | 0.315          | 0.161             | 0.971          | 0.914       | 0.05           | 0.099             |
| Run percentage at 90°                   | 0.19           | 0.153             | 0.971          | 0.912       | 0.05           | 0.111             |
| Short run emphasis at 90°               | 0.353          | 0.186             | 0.912          | 0.829       | 0.05           | 0.121             |
| Grey level non-uniformity at 135°       | 0.28           | 0.227             | 0.393          | 0.214       | 0.073          | 0.061             |
| High grey level run emphasis at 135°    | 0.247          | 0.217             | 0.043          | 0.051       | 0.895          | 0.395             |
| Long run emphasis at 135°               | 0.105          | 0.076             | 0.971          | 0.828       | 0.072          | 0.136             |

# Application of image texture analysis techniques on the effects of dry needling versus placebo in low-back pain patients. A conceptual pilot-study.

Between groups differences.

|                                          | Pretreatment   |                   | Posttreatment  |             | 1 week         |                   |
|------------------------------------------|----------------|-------------------|----------------|-------------|----------------|-------------------|
|                                          | U Mann-Whitney | Exact permutation | U Mann-Whitney | Permutation | U Mann-Whitney | Exact permutation |
| Long run low grey level emphasis at 135° | 0.684          | 0.668             | 0.011          | 0.009       | 0.67           | 0.474             |
| Run length non-uniformity at 135°        | 0.143          | 0.091             | 0.796          | 0.822       | 0.072          | 0.119             |
| Run percentage at 135°                   | 0.19           | 0.084             | 0.853          | 0.832       | 0.085          | 0.13              |
| Short run emphasis at 135°               | 0.143          | 0.106             | 0.796          | 0.727       | 0.06           | 0.14              |
| Kurtosis                                 | 0.481          | 0.384             | 0.19           | 0.126       | 0.382          | 0.541             |
| Skewness                                 | 0.631          | 0.585             | 0.19           | 0.201       | 0.615          | 0.577             |
| Mean                                     | 0.089          | 0.205             | 0.143          | 0.087       | 0.306          | 0.152             |
| Variance                                 | 0.043          | 0.037             | 0.035          | 0.075       | 0.028          | 0.032             |
| Standard deviation                       | 0.043          | 0.037             | 0.035          | 0.075       | 0.028          | 0.022             |
